# Supplementary material for: A novel human gastric primary cell culture system for modelling Helicobacter pylori infection in vitro
Source: PubMed Central journal article supplement — Gut. 2014 Dec 24;65(2):202–13. doi: 10.1136/gutjnl-2014-307949 (PMC4752654; doi:10.1136/gutjnl-2014-307949), 2014-12-24
Supplement: gutjnl-2014-307949-s5.pdf [file gutjnl-2014-307949-s5.pdf]

## Supplementary Figure 4

**A**

Enrichment analysis of genes up-regulated in corpus tissue compared to up- and down-regulated genes in corpus organoids

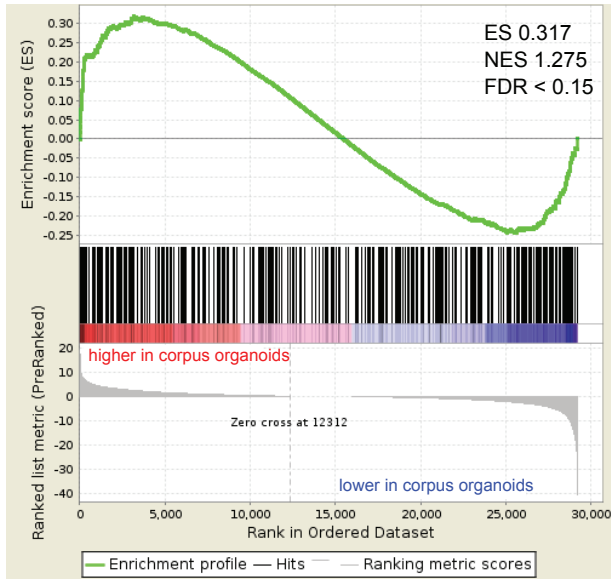

Ranked genes up-regulated in corpus organoids vs. corpus tissue

**B**

Enrichment analysis of genes up-regulated in antrum tissue compared to up- and down-regulated genes in antrum organoids

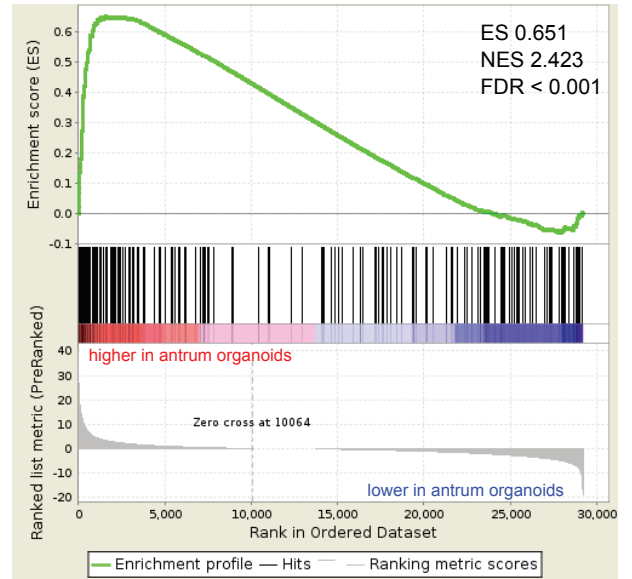

Ranked genes up-regulated in antrum organoids vs. antrum tissue
