# Supplementary material for: A novel human gastric primary cell culture system for modelling Helicobacter pylori infection in vitro
Source: PubMed Central journal article supplement — Gut. 2014 Dec 24;65(2):202–13. doi: 10.1136/gutjnl-2014-307949 (PMC4752654; doi:10.1136/gutjnl-2014-307949), 2014-12-24
Supplement: gutjnl-2014-307949-s9.pdf [file gutjnl-2014-307949-s9.pdf]

| Antibody               | Manufacturer   | Catalog no. | Dilution | Used for |
|------------------------|----------------|-------------|----------|----------|
| anti-E-cadherin        | BD             | 610181      | 1:200    | ICC      |
| anti- $\beta$ -catenin | Abcam          | ab2365      | 1:100    | ICC      |
| anti-Muc6              | Abcam          | ab49462     | 1:100    | ICC      |
| anti-Muc5AC            | Abcam          | ab3649      | 1:100    | ICC      |
| anti-Ki67              | Cell Signaling | #9027S      | 1:100    | ICC      |
| anti-Occludin          | Invitrogen     | 331500      | 1:200    | ICC      |
| anti-CagA              | Santa Cruz     | sc-25766    | 1:500    | WB       |
| anti-pTyr (PY99)       | Santa Cruz     | sc-7020     | 1:500    | WB       |
| anti- $\beta$ -actin   | Sigma          | A5441       | 1:5000   | WB       |
| sheep anti-mouse HRP   | Amersham       | NA931V      | 1:3000   | WB       |
| donkey anti-rabbit HRP | Amersham       | NA934V      | 1:3000   | WB       |

**Supplementary Table 1. Details of antibodies used in the study.**
