# Supplementary material for: A novel human gastric primary cell culture system for modellingHelicobacter pyloriinfection in vitro
Source: HighWire-hosted journal article supplement (doi:10.1136/gutjnl-2014-307949), 2014-12-24
Supplement: gutjnl-2014-307949supp_table2.pdf [file gutjnl-2014-307949supp_table2.pdf]

| <b>Gene name</b> | <b>Forward primer</b>   | <b>Reverse primer</b>    |
|------------------|-------------------------|--------------------------|
| CD44             | AGCACCATTTCAACCACACC    | GCAGTGGTGCCATTTCTGTC     |
| PGC              | TGTCTTTGGGGGTGTGGATAG   | ATGAGGAACTCTTCAATGCCAATC |
| Muc6             | CAGCTCAACAAGGTGTGTGC    | TGGGGAAAGGTCTCCTCGTA     |
| CDH1             | TACCCTGGTGGTTCAAGCTG    | CCTGACCCTGTACGTGGTG      |
| CTNNB1           | AGCAATTTGTGGAGGGGGTC    | AGCAGCTGCACAAACAATGG     |
| EPCAM            | GCTGGCCGTAAACTGCTTTG    | ACATTTGGCAGCCAGCTTTG     |
| Krt8             | CTCAAAGGCCAGAGGGCTTC    | CTCCAGCTCGGACAACCTGG     |
| Krt18            | TTCTGGGGGCATGAGCTTCAC   | GCGCCTGCATAGACGCTG       |
| Krt19            | GTCACAGCTGAGCATGAAAGC   | AGCTGGGCTTCAATACCGC      |
| IL-8             | ACACTGCGCCAACACAGAAAT   | ATTGCATCTGGCAACCCTACA    |
| GAPDH            | GGTATCGTGGAAGGACTCATGAC | ATGCCAGTGAGCTCCCGTTCAG   |

**Supplementary Table 2. Details of primers used in the study.**
