# Supplementary figures and images for: A novel human gastric primary cell culture system for modelling Helicobacter pylori infection in vitro
Source: PubMed Central journal article supplement — Gut. 2014 Dec 24;65(2):202–13. doi: 10.1136/gutjnl-2014-307949 (PMC4752654; doi:10.1136/gutjnl-2014-307949), 2014-12-24

# Supplementary Figure 1

Fresh culture

Thawed culture

Donor 1

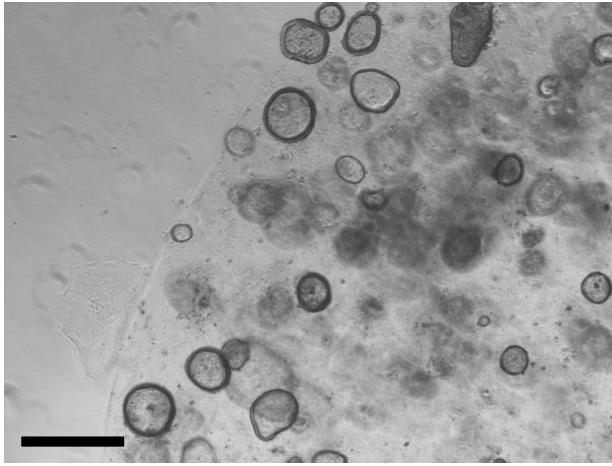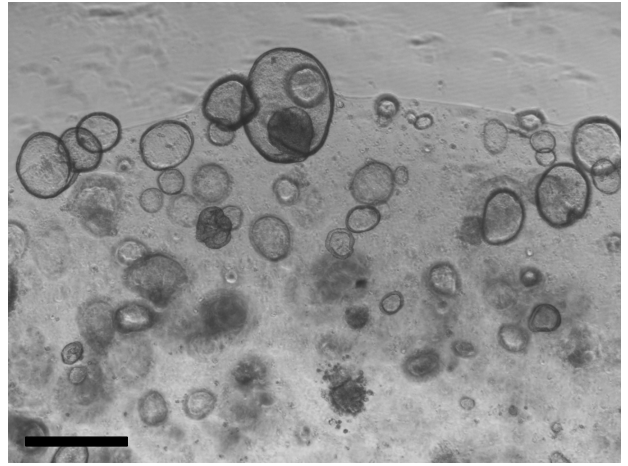

Donor 2

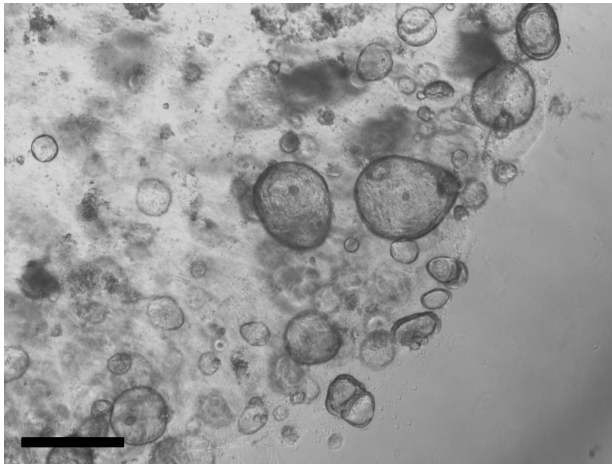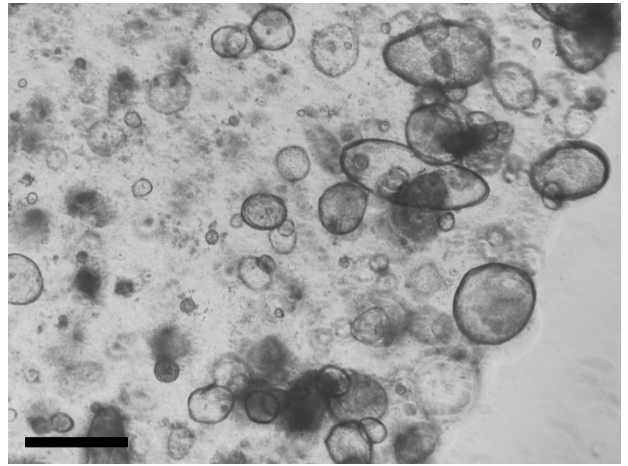

Supplement: gutjnl-2014-307949-s2.pdf [file gutjnl-2014-307949-s2.pdf]

## Supplementary Figure 2

A

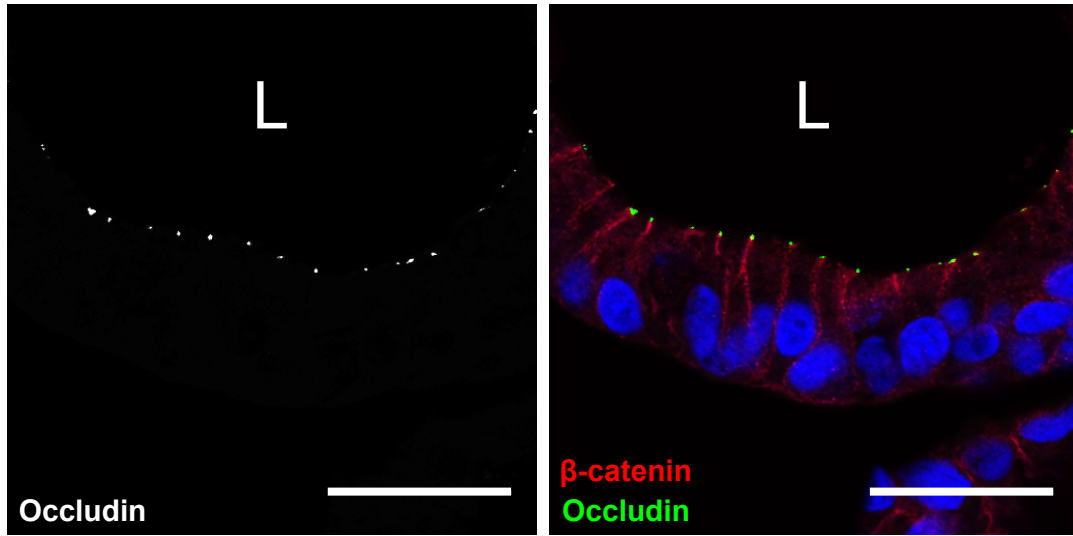

B

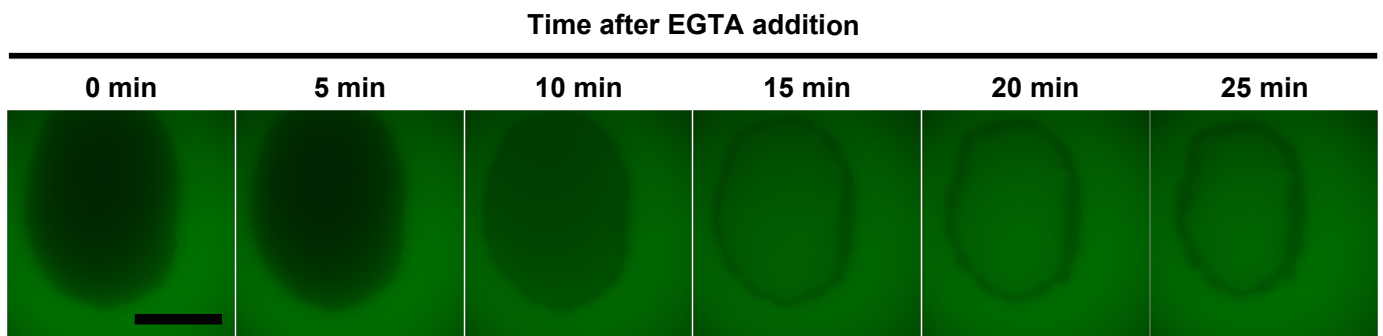

C

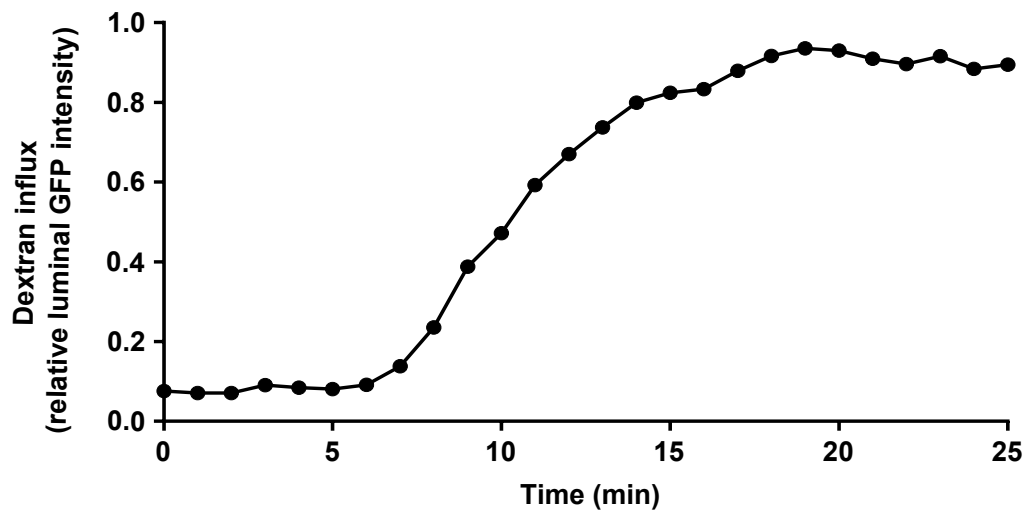

Supplement: gutjnl-2014-307949-s3.pdf [file gutjnl-2014-307949-s3.pdf]

### Supplementary Figure 3

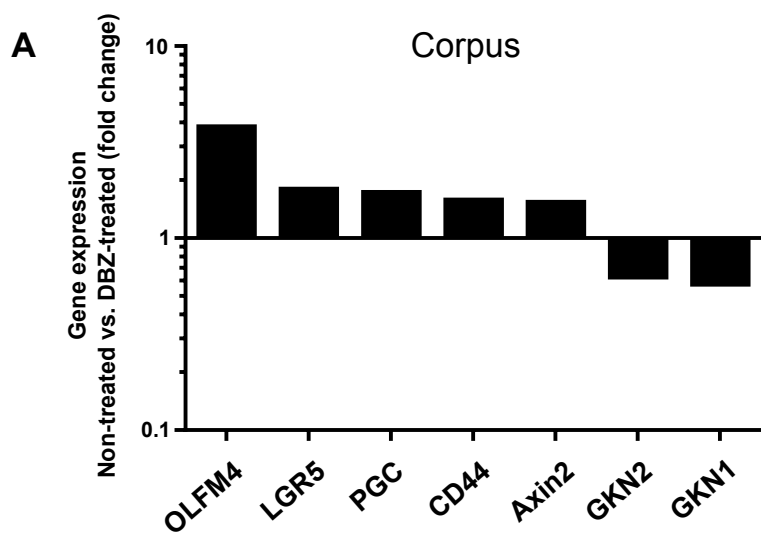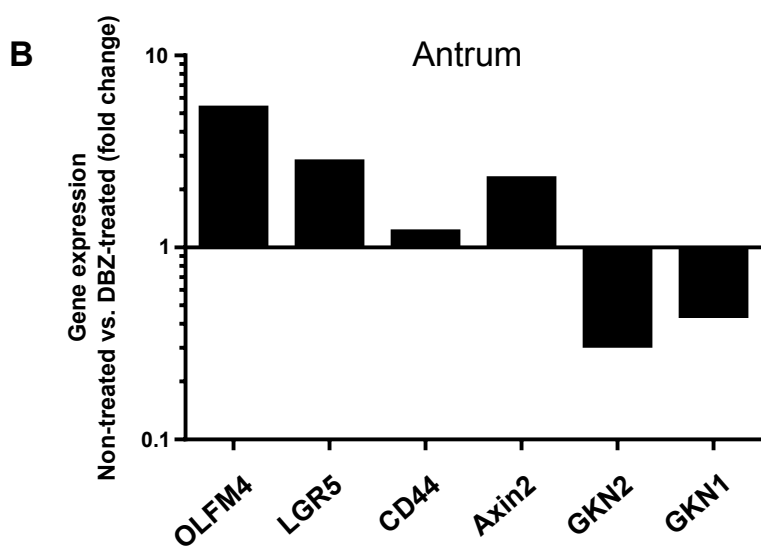

Supplement: gutjnl-2014-307949-s4.pdf [file gutjnl-2014-307949-s4.pdf]

## Supplementary Figure 5

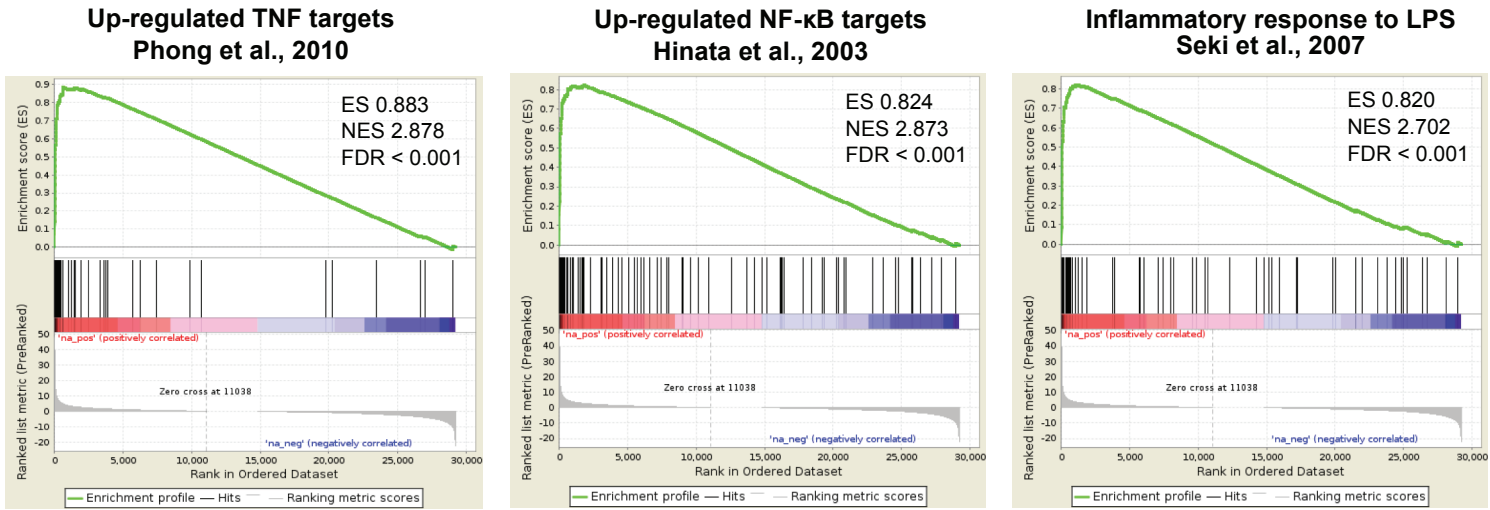

Ranked genes up-regulated in infected vs. non-infected primary cells

Supplement: gutjnl-2014-307949-s6.pdf [file gutjnl-2014-307949-s6.pdf]

# Supplementary Figure 6

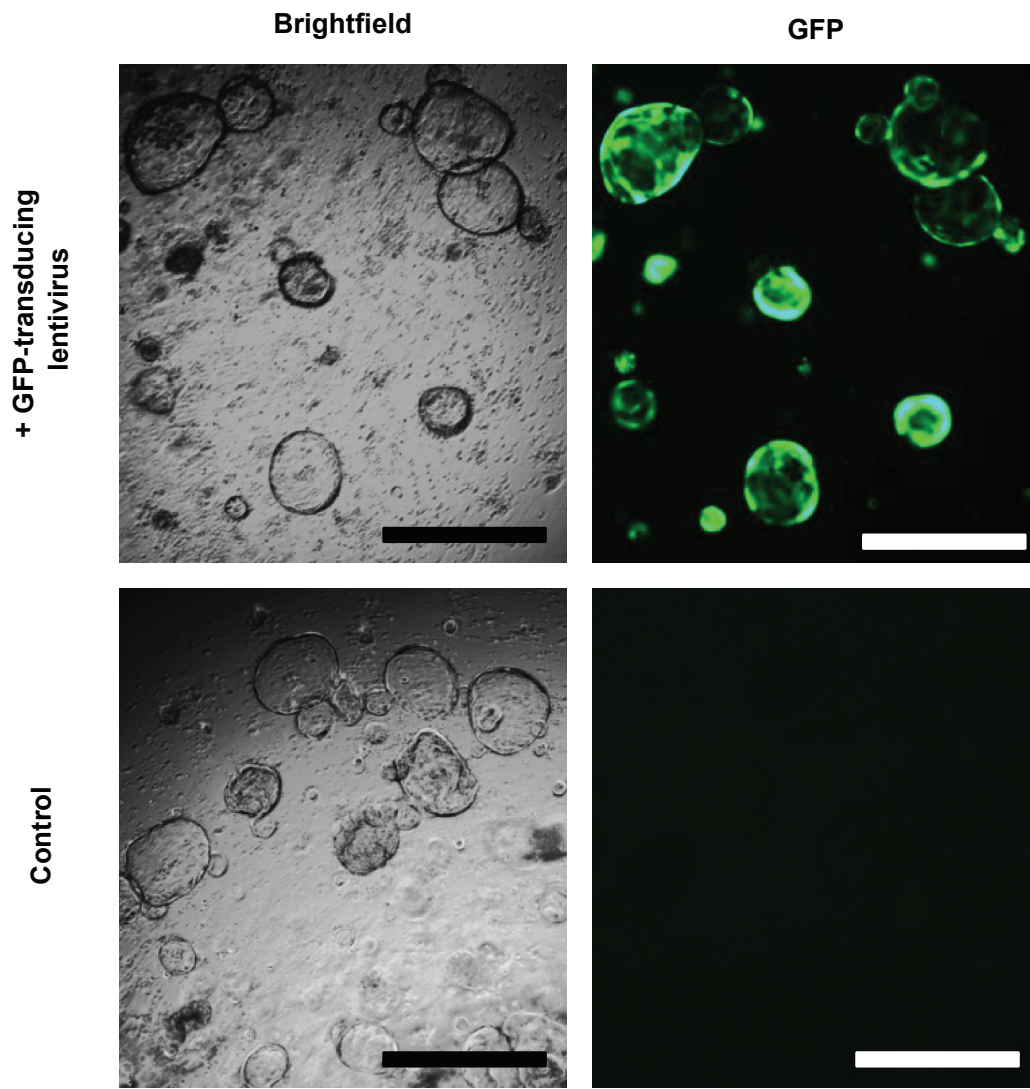

Supplement: gutjnl-2014-307949-s7.pdf [file gutjnl-2014-307949-s7.pdf]
